# Supplementary material
Source: PubMed Central journal article supplement (PMC5947681)
Supplement: f-74-00105-sup1.pdf [file f-74-00105-sup1.pdf]

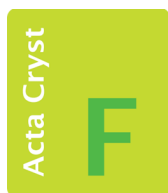

STRUCTURAL BIOLOGY  
COMMUNICATIONS

**Volume 74 (2018)**

**Supporting information for article:**

**Structural characterization of *Porphyromonas gingivalis* enoyl-ACP reductase II (FabK)**

**Kirk F. Hevener, Bernard D. Santarsiero, Hyun Lee, Jesse A. Jones, Teuta Boci, Michael E. Johnson and Shahila Mehboob**

### Figure Notes.

1. Figures S1, S2, and S3 were generated using the PrimeX software included in the Schrodinger molecular modeling package; Schrödinger Release 2017-3: PrimeX, Schrödinger, LLC, New York, NY, 2017.
  - Bell JA, Cao Y, Gunn JR, Day T, Gallicchio E, Zhou Z, Levy R and Farid R, "PrimeX and the Schrödinger Computational Chemistry Suite of Programs," *International Tables for Crystallography*, **2012**, 534-538.
2. Figure S4 was generated using the UCSF Chimera package. *Chimera is developed by the Resource for Biocomputing, Visualization, and Informatics at the University of California, San Francisco (supported by NIGMS P41-GM103311).*
  - Pettersen EF, Goddard TD, Huang CC, Couch GS, Greenblatt DM, Meng EC, Ferrin TE, "UCSF Chimera--a visualization system for exploratory research and analysis," *J Comput Chem.* **2004**, 25(13):1605-12.

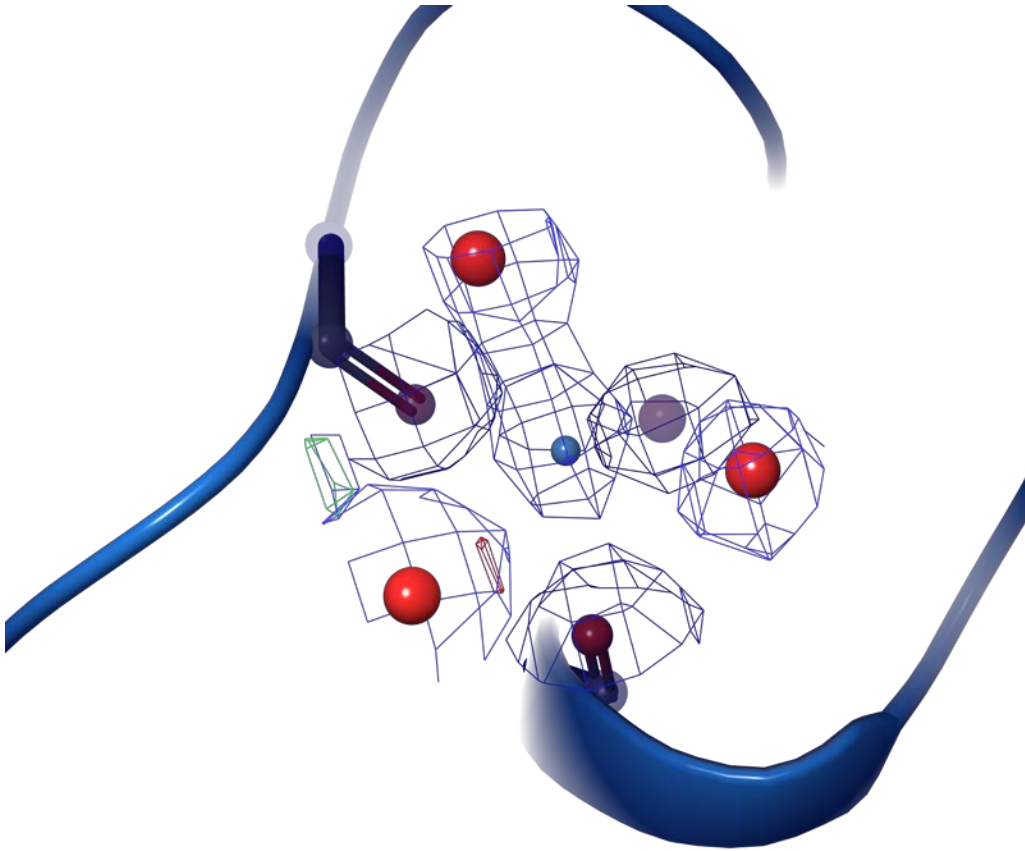

**Figure S1. Sodium ion (B-405) contour map and difference map overlay.** A sodium ion and its associated water molecules and coordinating residues are shown with both 2Fo-Fc (at 1 r.m.s.d.) and Fo-Fc (at 3 r.m.s.d.) maps. The maps have been truncated at a 2 Å distance from the displayed sodium atom (blue). Octahedral coordination geometry is discernable from the electron density which is consistent with a metal ion at this position rather than water.

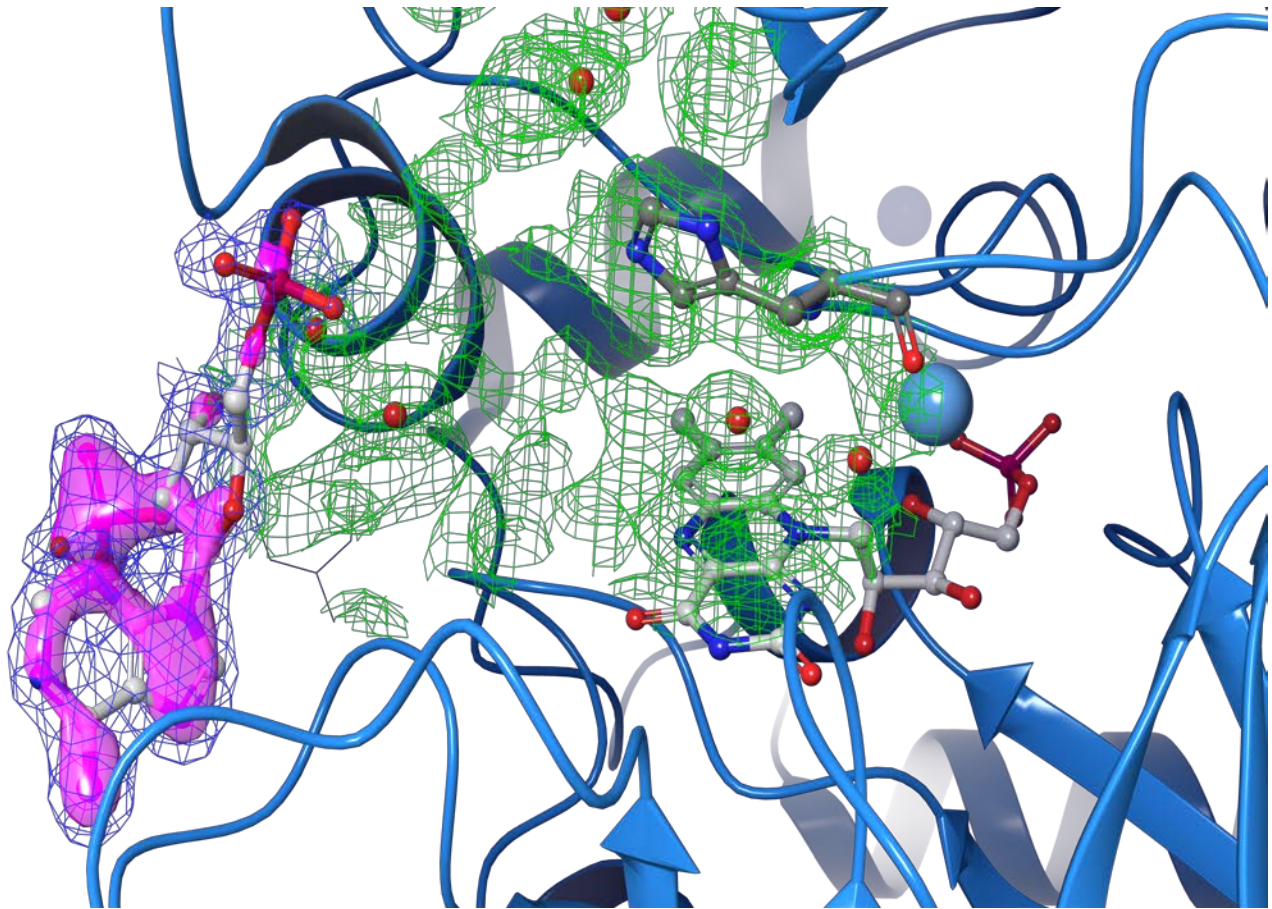

**Figure S2. NADP and *PgFabK* Active Site Electron Density.** Shown is the *PgFabK* active site with NADP (left), FMN (right), and modeled active site waters and sodium ion. 2Fo-Fc contour maps are shown at r.m.s.d. of 1 (blue mesh) and 2 (purple solid) for NADP with truncation at 1 Å from the NADP atoms. A 2Fo-Fc contour map at r.m.s.d. of 0.5 (green mesh) is shown for the active site region spanning NADPH and the FMN prosthetic group, selected by centering between the two ligands.

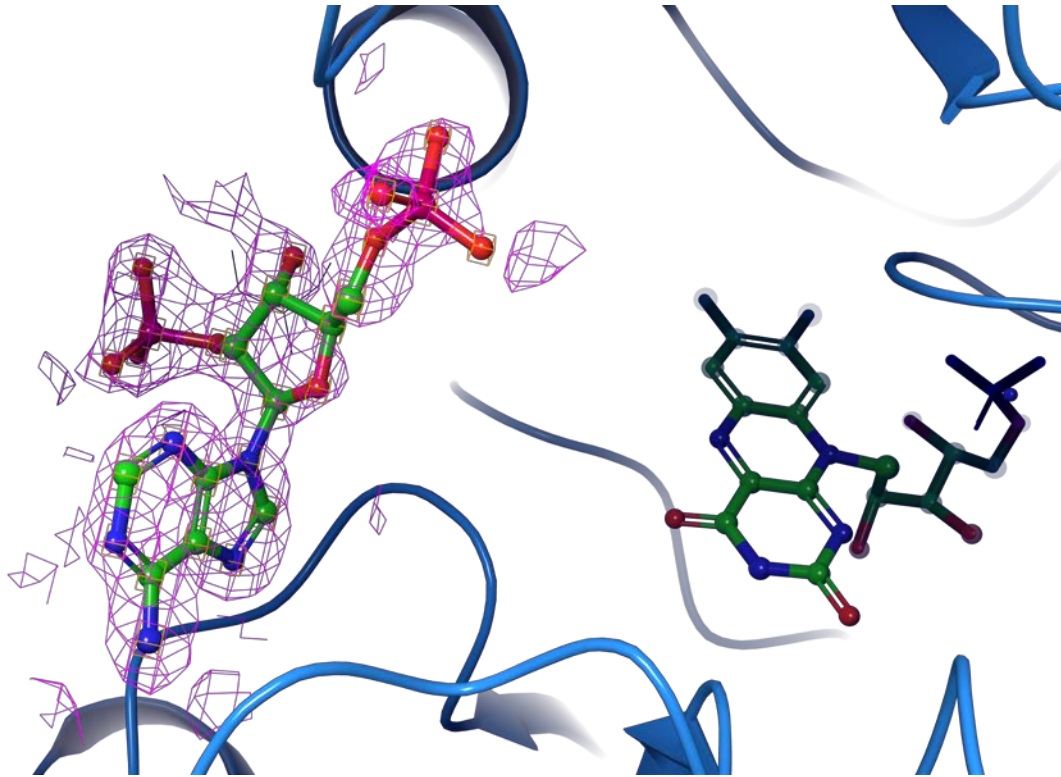

**Figure S3. 2Fo-Fc Omit Map.** Shown is a 2Fo-Fc omit map calculated by omitting the active site NADP molecule. The r.m.s.d. is 1 with truncation of the map at 2 Å from the NADPH atoms.

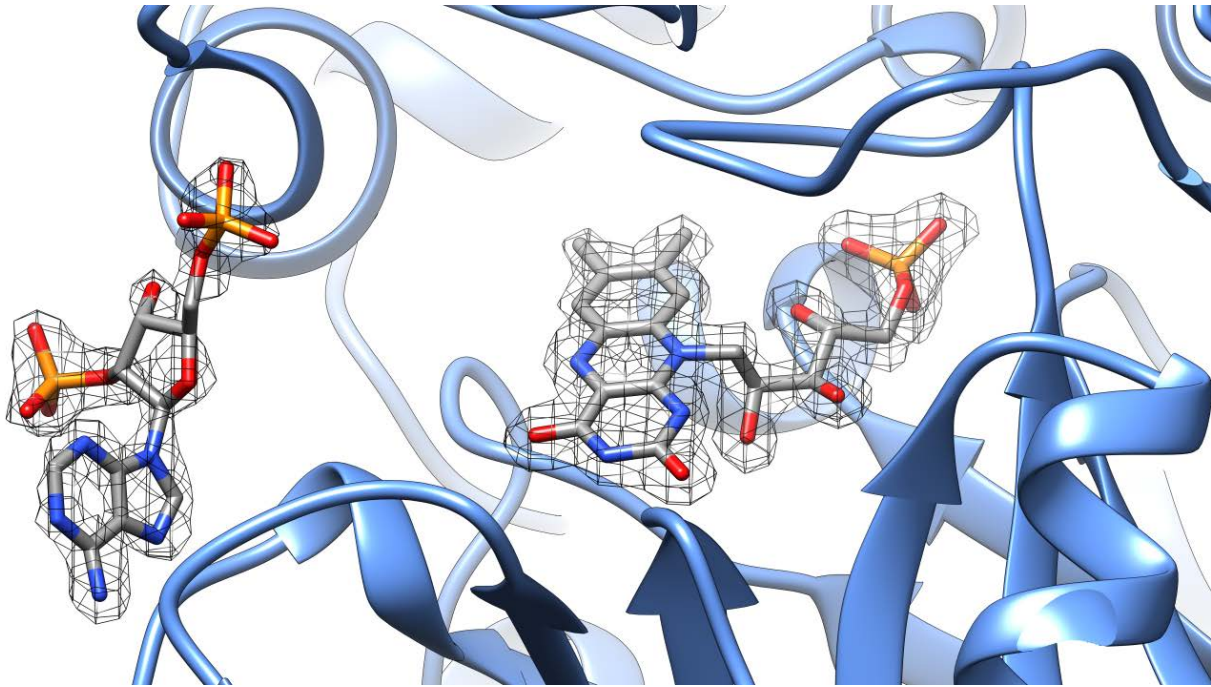

**Figure S4. FabK Cofactor FMN and NADPH Electron Density.** 2Fo-Fc contour map showing electron density of FMN prosthetic group and NADPH fragment spanning the *PgFabK* active site (shown at 1.25 r.m.s.d. with a zone radius cutoff of 1.5 Å from the FMN and NADPH ligands).

```

PgFabK      1  ---MNRICELLGIEHPIISGGMVWCSGWKLASAVSNCGGLGIGAGSMHPDNLEHHIRSC
SpFabK      1  --MKTRITELLKIDYPIFQGGMAWVADGDLGAVSKAGGLGIIIGGNAPKEVVKANIDKI
TmFabK      1  MTVTRTRVTDLLEIEHPIIMGGMAWAGTPTLAAAVSEAGGLGIIIGSGAMKPDRLRKAISEL
consensus   1  ...*...** *...** **.* ** . **.* ** .***** ** * .. . . . * .

PgFabK      58  KAAFDKPFQVNVPLLYPEMDKIMEIIMREHVPVVVTSAGSPKVWTAKLKAAGSKVIHVVS
SpFabK      59  KSLTDKPFQVNIIMLLSPFVEDIVDLVIEEGVKVVTGAGNPSKYMERFHEAGIIVIPVVP
TmFabK      61  RQKTDKPFQVNIIMLVSPWADDLVKVCIEEKVPVVTFGAGNPTKYIRELKENGTKVIPVVA
consensus   61  . ***** ..* ..* ..* ..* ..* ..* ..* ..* ..* ..* ..* ..* ..* ..*

PgFabK      118  SATFARKSEAGVDAlVAEGFEAGGHNGREETTTLCLIPEVVDVAVNIPVVAAGGIASGRA
SpFabK      119  SVALAKRMEKIGADAVIAEGMEAGGHIGKLL--TTMTLVRQVATAISIPVIAAGGIADGEG
TmFabK      121  SDSLARMVERAGADAVIAEGMESGGHIGEV--TTFVLVNKVSRSVNIPVIAAGGIADGRG
consensus   121  * ..* ..* ..* ..* ..* ..* ..* ..* ..* ..* ..* ..* ..* ..* ..* ..*

PgFabK      178  VAAALALGADAVQVGRFALSEESSAHEDFKAHCRRSVEGDTMLSL-KAVSPTRLKKNKF
SpFabK      177  AAAGFMLGAEAVQVGRFVAKESNAHPNYKEKILKARDIDTTISAQHFQHAVRAIKNQQL
TmFabK      179  MAAAFALGAEAVQVGRFVASVESDVHPVYKEKIVKASIRDVTVVTGAKLGHPARVLRTPF
consensus   181  .** ..* ..* ..* ..* ..* ..* ..* ..* ..* ..* ..* ..* ..* ..* ..*

PgFabK      237  YQDVFAAEQRCA----SVEELRELI GRGRAKQGI FEGDLHEGELEIGQAVSQISHAETVA
SpFabK      237  TRDFELAEKDAFKQEDPDLEIFEQMGAGALAKAVVHGDVDGGSVMAGQIAGLVSKETAE
TmFabK      239  ARKIQEMEFEN-----PMQAEEMLVGSLRRRAVVEGDLERGSFMVQGSAGLIDEIKPVK
consensus   241  ... * .. ..* ..* ..* ..* ..* ..* ..* ..* ..* ..* ..* ..* ..*

PgFabK      293  EIMVDLV DGYKRS LAGMPTEI-----
SpFabK      297  EILKDLYYGAAKIQEEASRWTGVVRND
TmFabK      292  QIIEIILKEEKE----TVEKLRGYIEE-
consensus   301  .* * .. . . . . . . . . . . . . . . . . . . . . . . . . . . . . .

```

**Figure S5. FabK Multiple Sequence Alignment.** Multiple sequence alignment of *P. gingivalis*, *S. pneumoniae*, and *T. maritima* FabK enzymes. Produced using Clustal Omega at EMBL-EBI (Sievers, F., et al. (2011). *Mol. Syst. Biol.* **7**, 539.) and rendered using the BoxShade program at the ExPASy Bioinformatics Resource Portal. Conserved active site structural motif of the NMO family of flavoproteins is shown in red box.
